1                   **Standing Sentinel during Human Sleep: Continued Evaluation of Environmental**  
2                   **Stimuli in the Absence of Consciousness**

3  
4                   Christine Blume<sup>1,2</sup>, Renata del Giudice<sup>1,2</sup>, Malgorzata Wislowska<sup>1,2</sup>,

5                   Dominik P. J. Heib<sup>1,2</sup>, Manuel Schabus<sup>1,2</sup>

6  
7                   <sup>1</sup> University of Salzburg, Department of Psychology, Laboratory for Sleep, Cognition and  
8                   Consciousness Research

9                   <sup>2</sup> University of Salzburg, Centre for Cognitive Neuroscience Salzburg (CCNS)

10  
11           **Corresponding Author:**

12           Univ.-Prof. Dr. Manuel Schabus

13           University of Salzburg

14           Centre for Cognitive Neuroscience (CCNS)

15           Laboratory for “Sleep, Cognition and Consciousness Research”

16           Hellbrunner Str. 34

17           A-5020 Salzburg

18           Email: [manuel.schabus@sbg.ac.at](mailto:manuel.schabus@sbg.ac.at)

19  
20           *Authors' email addresses:*

21           [christine.blume@sbg.ac.at](mailto:christine.blume@sbg.ac.at)

22           [renata.delgiudice@sbg.ac.at](mailto:renata.delgiudice@sbg.ac.at)

23           [malgorzata.wislowska@sbg.ac.at](mailto:malgorzata.wislowska@sbg.ac.at)

24           [dominik.heib@sbg.ac.at](mailto:dominik.heib@sbg.ac.at)

25  
26           **Funding**

27           CB is supported by the Konrad-Adenauer-Stiftung e.V. and CB, MW and DPJH are supported by a grant  
28           from the Austrian Science Fund FWF (Y-777). CB, RdG, MW and DPJH are also supported by the  
29           Doctoral College “Imaging the Mind” (FWF; W1233-G17).

31 **Abstract**

32 While it is a well-established finding that subject's own names (SON) or familiar voices are salient  
33 during wakefulness, we here investigated processing of environmental stimuli during sleep including deep  
34 N3 and REM sleep. Besides the effects of sleep depth we investigated how sleep-specific EEG patterns  
35 (i.e. sleep spindles and slow oscillations [SOs]) relate to stimulus processing. Using 256-channel EEG we  
36 studied processing of auditory stimuli by means of event-related oscillatory responses (de-/  
37 synchronisation, ERD/ERS) and potentials (ERPs) in  $N = 17$  healthy sleepers. We varied stimulus  
38 salience by manipulating subjective (SON vs. unfamiliar name) and paralinguistic emotional relevance  
39 (familiar vs. unfamiliar voice, FV/UFV). Results reveal that evaluation of voice familiarity continues  
40 during all NREM sleep stages and even REM sleep suggesting a 'sentinel processing mode' of the human  
41 brain in the absence of wake-like consciousness. Especially UFV stimuli elicit larger responses in a 1-15  
42 Hz range suggesting they continue being salient. Beyond this, we find that sleep spindles and the negative  
43 slope of SOs attenuate information processing. However, unlike previously suggested they do not  
44 uniformly inhibit information processing, but inhibition seems to be scaled to stimulus salience.

45

46

47 *Keywords:* sleep, sleep spindles, slow oscillations, high-density electroencephalography, auditory  
48 stimulation

## 49 **1. Introduction**

50 Cognitive processing and task performance are well-known to vary with time of day (Dijk et al.,  
51 1992; Santhi et al., 2016; Wyatt et al., 1999). Behaviourally, these variations can readily be observed with  
52 major changes in performance paralleling the sleep-wake cycle. Beyond these within-state studies that  
53 investigated wakefulness only, we lately studied cognitive processing during the fading of consciousness,  
54 which we here define as behavioural responsiveness, that is across vigilance stages from waking to light  
55 NREM sleep (Blume et al., 2016). Specifically, during a nap we compared processing of subjectively  
56 relevant vs. irrelevant stimuli (i.e. subject's own names [SONs] vs. unfamiliar names [UNs]) during  
57 wakefulness and non-rapid eye movement (NREM) sleep stages N1 and N2. Besides subjective relevance  
58 we additionally varied the emotional prosody of stimuli (i.e. stimuli spoken by an angry vs. a neutral  
59 voice [AV vs. NV]). Interestingly, we found evidence for preferential processing of salient stimuli (i.e.  
60 SONs and AV stimuli) not only during wakefulness, but also during light NREM sleep, with these  
61 findings suggesting not only continued processing of external stimuli, but a 'sentinel processing mode' of  
62 the brain during states of decreased consciousness and naturally occurring unconsciousness, that is N1  
63 and N2 sleep, respectively. Moreover, this initial preferential processing of salient stimuli seemed to be  
64 accompanied by a subsequent inhibitory sleep-protecting process during N2 sleep that was reflected by a  
65 K-complex-like response.

66 In the present study we sought to replicate our previous findings on the interaction between  
67 'enduring brain' or vigilance states (i.e. wakefulness, N1 and N2 sleep) and stimulus characteristics and  
68 expand them to deep N3 as well as rapid-eye-movement (REM) sleep during a full night. Beyond this, we  
69 aimed at investigating the interaction between stimulus characteristics and 'transient brain states', namely  
70 sleep spindles and slow oscillations representing sleep-specific electroencephalogram (EEG) phenomena  
71 in more fine-grained analyses. Sleep spindles are considered the hallmark of N2 sleep albeit they also  
72 occur during sleep stage N3. They are defined as bursts of oscillatory activity in the sigma range (11-15  
73 Hz) with a characteristic waxing and waning shape and a duration of 0.5-3s. Slow oscillations (SOs), on

74 the other hand, are defined as large delta waves with a first negative going wave that is followed by a  
75 positive going deflection (for criteria applied here see Riedner et al., 2007 and p. 5 of the supplementary  
76 material). Importantly, they occasionally occur during N2 sleep already, where they are often denoted K-  
77 complexes and can be considered ‘forerunners’ of or ‘sub-threshold’ SOs (Amzica & Steriade, 1997; De  
78 Gennaro et al., 2000) and are sometimes even denoted ‘peripherally evoked slow waves’ (Bellesi et al.,  
79 2014). With increasing sleep depth, the probability of occurrence of SOs strongly increases with the  
80 amount of SOs also being a criterion for deep N3 sleep.

81 While it is well-established that the brain is not completely shut off from the environment during  
82 sleep but continues to process external stimuli (e.g. Bastuji & García-Larrea, 1999; Blume et al., 2016;  
83 Perrin et al., 1999; Strauss et al., 2015), studies also suggest that sleep-specific oscillatory patterns, that is  
84 sleep spindles as well as SOs, can significantly alter stimulus processing. Generally, it has been suggested  
85 that during spindles the thalamus acts as a sensory filter inhibiting sensory transmission to the forebrain  
86 (Steriade, 1991). The negative or positive going slope of SOs on the other hand has been associated with  
87 changes in the probability of synaptic release at the cortical level, which could affect stimulus processing  
88 (Massimini & Amzica, 2001). In a combined EEG and functional magnetic resonance imaging (fMRI)  
89 study Schabus et al. (2012) found that responses to simple tones during NREM sleep were comparable to  
90 responses during wakefulness except for when tones were presented during a spindle or the negative  
91 going slope of a slow oscillation thereby also confirming previous findings (Dang-Vu et al., 2011; see De  
92 Gennaro & Ferrara, 2003 for an overview; Massimini et al., 2003). Likewise, in a study that looked at  
93 event-related potentials (ERPs) Elton et al. (1997) suggested that sleep spindles inhibit processing of  
94 auditory stimuli and Cote et al. (2000) additionally found the effect of sleep spindles on processing to be  
95 modulated by stimulus intensity. Specifically, they report that spindles co-occurring with more intense  
96 (i.e. louder) stimuli seemed to inhibit processing to a greater extent than was the case with less intense  
97 stimuli. Regarding slow oscillatory activity on the other hand, a pioneering study by Oswald et al. (1960)  
98 already showed that SONs evoke more K-complexes (KCs) than do unfamiliar names. Beyond this,

99 Massimini et al. (2003) showed that evoked somatosensory EEG potentials were strongly modified not  
100 only by the presence but also by the phase of the slow oscillation. In summary, these findings strongly  
101 suggest that sleep spindles and slow oscillatory activity systematically alter stimulus processing during  
102 NREM sleep in a dynamic manner.

103 The aim of the present study was to investigate processing of more complex auditory stimuli (as  
104 compared to simple tones) in relation to (i) ‘enduring’ as well as (ii) ‘transient’ states of the brain.  
105 Complex stimuli were first names that varied in salience on two dimensions, namely subjective relevance  
106 (SONs vs. UNs) and familiarity or paralinguistic aspects of emotional relevance. Specifically, stimuli  
107 were uttered by a familiar voice (FV) vs. a stranger’s voice (unfamiliar voice [UFV]). Regarding the first  
108 aim, we studied stimulus processing during all ‘enduring brain states’ across the vigilance continuum (i.e.  
109 during wakefulness, N1, N2, N3 and REM sleep) irrespective of the ‘transient state’. Regarding  
110 ‘transient’ brain states, we investigated between-stimulus differences in oscillatory activity when (i) a  
111 spindle was present during stimulus presentation, when a stimulus was presented during the (ii) positive  
112 slope of a SO, (iii) during the negative slope and when (iv) stimulus presentation evoked a SO. Processing  
113 was studied by comparing oscillatory brain responses evoked by stimulus presentation in each of these  
114 cases, that is event-related synchronisation (ERS) and desynchronisation (ERD) in the delta (1-3 Hz),  
115 theta (4-7 Hz), alpha (8-12 Hz) and sigma (11-15 Hz) frequency range. Functionally, delta ERS has  
116 repeatedly been linked to attentional processes and the detection of salient or motivationally relevant  
117 stimuli (for reviews see Knyazev, 2007; Knyazev, 2012) while theta ERS has been suggested to indicate  
118 the encoding of new information as well as working and episodic memory involvement (for a review see  
119 Klimesch, 1999; Klimesch et al., 2005). Alpha ERD on the other hand is thought to reflect task demands,  
120 attentional processes and memory retrieval processes (for a review see Klimesch, 1999; Klimesch et al.,  
121 1998). Importantly, all these interpretations have been established during wakefulness and it is likely that  
122 their functional roles are different during sleep. In a previous publication, we suggested that delta and

123 theta ERS during sleep may mirror an inhibitory sleep-protecting response following initial processing of  
124 salient stimuli as has been suggested for sigma ERS (Blume et al., 2016).

125 We hypothesised that oscillatory responses would mirror salience of SONs as well as FV stimuli  
126 (compared to UNs and UFV) during wakefulness. Moreover, we expected responsiveness to stimuli to  
127 vary with the ‘enduring brain state’, that is a decrease in responsiveness from wakefulness to N3 sleep.  
128 Regarding the ‘transient brain state’ we expected that when stimulus-presentation co-occurs with sleep  
129 spindles and slow oscillations the differential brain response elicited by stimulus salience would vanish.  
130 This should specifically be the case when stimulus onset coincided with the negative slope of the slow  
131 oscillation or stimulus presentation largely overlapped with a sleep spindle.

132

## 133 **2. Methods and Materials**

### 134 **2.1. Participants**

135 We recruited 20 healthy individuals for the study. Three participants were excluded from the data  
136 analysis, one dropped out after the adaptation night and two had to be excluded due to technical problems  
137 during the acquisition. The remaining sample comprised 17 participants (three males) and had a median  
138 age of 22.6 years ( $SD = 2.3$  years). Prior to the study, participants gave written informed consent. Ethical  
139 consent had been obtained from the ethics committee of the University of Salzburg and the study was in  
140 accordance with the Declaration of Helsinki (World Medical Association (WMA), 1964). For more  
141 details on the study sample please see supplementary material.

### 142 **2.2. Experimental procedure**

143 Participants were advised to keep a regular sleep/wake rhythm with eight hours time in bed (TIB) for  
144 at least four days prior to their first visit at our sleep laboratory, which was verified with wrist actigraphy  
145 (Cambridge Neurotechnology Actiwatch ©). Participants slept in the sleep laboratory of the University of  
146 Salzburg for two nights, one adaptation night and one experimental night. For details on the experimental  
147 procedure also see Figure 1.

148           The adaptation and experimental nights were comparable except for no auditory stimulation during  
149 sleep taking place during the adaptation night. On both nights and the following mornings participants  
150 were tested during wakefulness resulting in four wakefulness recordings per participant. The wakefulness  
151 part comprised a passive listening as well as an active counting condition, during which participants  
152 listened to the stimuli presented via in-ear headphones at a volume of approximately 65 dB. For the  
153 passive condition participants were instructed to listen attentively to the stimuli while in the active  
154 condition they were to count the number of presentations of one specific name (i.e. the target). The  
155 passive condition always preceded the active one. In this publication, we only present the results from the  
156 passive listening condition, in which participants were presented with their own name (SON) as well as  
157 two unfamiliar names (UNs) as it is the only condition that can be analysed meaningfully across  
158 ‘enduring brain’ or vigilance stages (i.e. wakefulness, NREM and REM sleep). Moreover, each name was  
159 uttered by a familiar (mother, father) and by an unfamiliar voice (lab member unknown to participant).  
160 The stimulus set was specific for each participant and all names of one stimulus set were matched  
161 regarding the number of syllables and the occurrence in the general population. During the wakefulness  
162 recording, each stimulus was presented 40 times and the interstimulus interval (ISI) was 2000ms.

163           Following the wakefulness recordings in the evenings, participants went to bed for an  $8\text{h}\pm 15\text{min}$   
164 sleep opportunity (median sleep duration 8h 2.5min) starting at their habitual bedtime (range 8:30-11:30  
165 pm). Participants were woken up during light NREM or REM sleep, which accounts for the jitter in the  
166 time in bed (TIB). During the experimental night, stimulation was continued and the volume was adjusted  
167 individually so stimuli were clearly audible, but participants felt they could sleep despite the stimulation.  
168 The auditory stimulation protocol was akin to the passive condition of the wake part, although during the  
169 night, the stimulus onset asynchrony (SOA) was jittered between 2.8 and 7.8 s in 500ms steps. SOA was  
170 jittered specifically in the sleep protocol as this was necessary to allow for an investigation of stimulus  
171 processing in relation to various EEG sleep phenomena (i.e. sleep spindles and slow oscillations)  
172 independent of expectation effects. SOA was not jittered during wakefulness as this would have rendered

173 the tasks lengthy and probably too fatiguing. During the night each stimulus was presented 690 times and  
174 had the same probability of occurrence as had each SOA. For more details on the experimental procedure  
175 please see the supplementary material and Fig. 1.

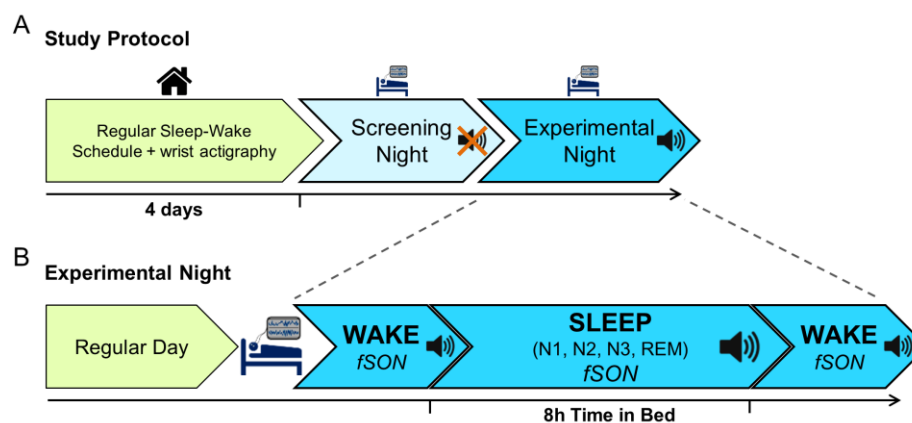

176  
177 **Fig. 1: Experimental Protocol. (A) Study Protocol.** Prior to the adaptation night in the laboratory,  
178 participants kept a regular sleep-wake schedule for four days with 8h time in bed (TIB). Adherence was verified by  
179 wrist actigraphy. During the adaptation night in the sleep laboratory polysomnography (PSG) was recorded, but no  
180 stimulation took place during sleep. **(B) Experimental Night.** The experimental night was akin to the adaptation  
181 night with wakefulness recordings preceding and following sleep. However, auditory stimulation was continued  
182 during a whole night of sleep (8h TIB).

### 183 184 2.3. *Electrophysiological data collection and reduction*

185 For EEG acquisition we used a 256 electrode GSN HydroCel Geodesic Sensor Net (Electrical  
186 Geodesics Inc., Eugene, Oregon, USA) and a Net Amps 400 amplifier.

#### 187 2.3.1. *Wakefulness data*

188 EEG data were processed using the Fieldtrip toolbox (Oostenveld et al., 2010) in Matlab  
189 (Mathworks, Natick, USA). First, the number of electrodes was reduced to 187 as the others (on the  
190 cheeks and down in the neck) contained a lot of ‘non-neural’ artefacts such as muscle artefacts and high-  
191 pass filtered at 0.5 Hz. Subsequently, eye movement artefacts were corrected using independent



192 component analysis (ICA), data were segmented into 4s epochs (symmetrically to stimulus onset) and bad  
193 intervals were removed manually during visual data inspection. In the next step, the number of electrodes  
194 was further reduced to a final number of 173 electrodes now excluding electrodes that had initially been  
195 kept for the identification of eye and muscular artefacts. Bad channels identified during visual data  
196 inspection were interpolated and data were re-referenced to average reference. Subsequently, we  
197 randomly selected the same number of trials for each stimulus to account for imbalances in the stimulus  
198 set (only one SON, but two UNs were presented). We then applied a Morlet wavelet transformation  
199 (cycles = 3, 1-16 Hz, 1 Hz frequency steps) to each of the segments, which was followed by a baseline  
200 correction (baseline interval: -600 to 0ms relative to stimulus onset) and averaging across trials. For more  
201 details on data processing please see supplementary material.

### 202 *2.3.2. Sleep data*

203 Sleep was scored semi-automatically by The Siesta Group© (Somnolyzer 24x7; cf. Anderer et al.,  
204 2005; Anderer et al., 2010; Anderer et al., 2004) according to standard criteria (American Academy of  
205 Sleep Medicine & Iber, 2007). Spindles were detected automatically during NREM sleep stages N2 and  
206 N3 at central leads using the algorithm by Anderer et al. (2005). Slow oscillations (SOs) were also  
207 detected automatically on frontal electrodes using lab-internal Matlab routines (cf. Heib et al., 2013)  
208 based on the criteria by Riedner et al. (2007) and confirmed by spot checks. For more details on the  
209 detection of spindles and SOs please see supplementary material. Pre-processing for the sleep data was  
210 essentially the same as for the wakefulness data; but we refrained from an automatic eye movement  
211 correction in order to not remove REMs. Beyond investigating processing of different stimuli across  
212 ‘enduring brain states’, that is in each sleep stage, we also investigated stimulus processing with regard to  
213 ‘transient brain states’, that is sleep spindles and SOs. To this end, we compared evoked oscillatory  
214 responses elicited by different stimuli when a spindle was present during stimulus onset (i.e. spindle  
215 offset min. 200ms after stimulus onset) or when there was a substantial overlap between a spindle and  
216 stimulus presentation (spindle onset 0-400ms after stimulus onset, i.e. spindle overlapping with at least

217 half of the stimulus on average, cf. Suppl.Fig.1, A). Moreover, we were interested in stimulus-specific  
218 differences in the evoked slow oscillatory responses (“SO evoked”). More precisely, a SO was defined as  
219 “evoked” when the negative peak occurred between 300 and 600ms after stimulus onset (cf. Suppl.Fig.1,  
220 B1), that is the time range when the negative components of evoked K-complexes (i.e. N350 and N550)  
221 have been found to occur (Cote et al., 1999). Beyond this, we compared stimulus processing when  
222 stimulus onset was during the positive going slope of a SO (cf. Suppl.Fig.1, B2) to when stimulus onset  
223 coincided with the down-state (cf. Suppl.Fig.1, B3). For more details on data collection and analysis  
224 please refer to the supplementary material.

#### 225 **2.4. Event-Related Potentials**

226 Although we focus on oscillatory activity in different frequency bands in the present manuscript,  
227 we provide results from event-related potential (ERP) analyses in the supplementary material (and Fig.1).

#### 228 **2.5. Statistical Analyses**

229 Statistical analyses were performed using the cluster-based permutation approach implemented in  
230 Fieldtrip to correct for multiple comparisons that uses a Monte Carlo method for calculating significance  
231 probabilities (Maris & Oostenveld, 2007). This approach has originally been introduced by (Bullmore et  
232 al., 1999) and is referred to as the ‘cluster mass test’ in the fMRI literature (for more details please see  
233 suppl. material). Three tests were run for the main effects of *name* (SON vs. UNs), *voice* (FV vs. UFV)  
234 and the *name* × *voice* interaction with significant interaction clusters (or trends) being followed by post-  
235 hoc tests. Thus, we report three *p*-values per condition (i.e. sleep stage and interaction with sleep spindle  
236 or SO). We ran a first set of tests for the delta range that included the dimensions electrode and frequency  
237 (1-3 Hz in 1 Hz frequency steps). In the delta range, values were averaged across time (0-1000ms after  
238 stimulus onset for the WAKE condition, 0-1200ms during SLEEP) as time resolution obtained with these  
239 low frequencies was considered insufficient for an analysis in the time dimension. A second test was then  
240 run for the theta, alpha and sigma ranges including the dimensions electrode, frequency (4-15 Hz, 1 Hz  
241 frequency steps) and time (0-1000ms, five time windows at 200ms each in the WAKE condition, 6 time

242 windows from 0-1200ms during SLEEP). For the “spindle vs. no spindle” and “negative vs. positive SO  
243 slope” contrasts we calculated averaged values for FV/UVF for each condition, which we then compared.  
244 Please note that for these comparisons we randomly selected a subset of trials so each participant  
245 contributed the same number of trials to each of the two conditions to be compared (i.e. for example the  
246 same number of “spindle” vs. “no spindle” trials). For all permutation tests the critical  $p$ -value for the  $T$ -  
247 statistic for dependent samples was set to 0.05 and 1000 randomisations were used. Spatial clusters were  
248 formed only if electrodes had a minimum of two neighbouring electrodes that were also significant. We  
249 report the Monte Carlo approximation for the estimate of  $p$ -values. Effects with (one-sided) *Monte Carlo*  
250  $p < .05$  are denoted significant, effects with *Monte Carlo*  $p < .1$  are denoted trends. We report  $\xi$   
251 (“explanatory measure of the effect size”) as a robust effect size measure for the comparison of two  
252 samples using trimmed means (Wilcox & Tian, 2011), which has been implemented for dependent  
253 samples in the ‘yuend’ function in the ‘WSR2’ R package (Mair et al., 2017; Wilcox, 2011). The  
254 interpretation of  $\xi$  corresponds to Cohen’s  $d$  with  $\xi = .1, .3$  and  $.5$  indicating small, medium and large  
255 effects, respectively. Critical  $p$ -values for post-hoc tests were adjusted for multiple comparisons using  
256 Bonferroni-Holm-corrected  $p$ -values. For more details on the statistical analyses please see the  
257 supplementary material.

258

### 259 **3. Results**

#### 260 **3.1. Wakefulness**

261 Analyses in the delta band (1-3 Hz) yielded a significant effect of *name* (see Fig. 2A and Suppl.  
262 Fig. 6). Specifically, analyses revealed that SONs led to stronger ERS at 2 Hz in a frontocentral and a  
263 parieto-occipital clusters (*Monte Carlo*  $p = .01$  and *Monte Carlo*  $p = .02$ , respectively). This effect was  
264 also visible in the ERP with SONs giving rise to a stronger P3 component than UNs (see Fig. 2B).  
265 Analyses did not indicate a significant effect of *voice* or a *name*  $\times$  *voice* interaction (*voice*: *Monte Carlo*  
266  $ps > 0.37$ ; *name*  $\times$  *voice*: *Monte Carlo*  $ps > .35$ ). For a summary of all results also see Suppl. Table 1.

## NAME WAKEFULNESS

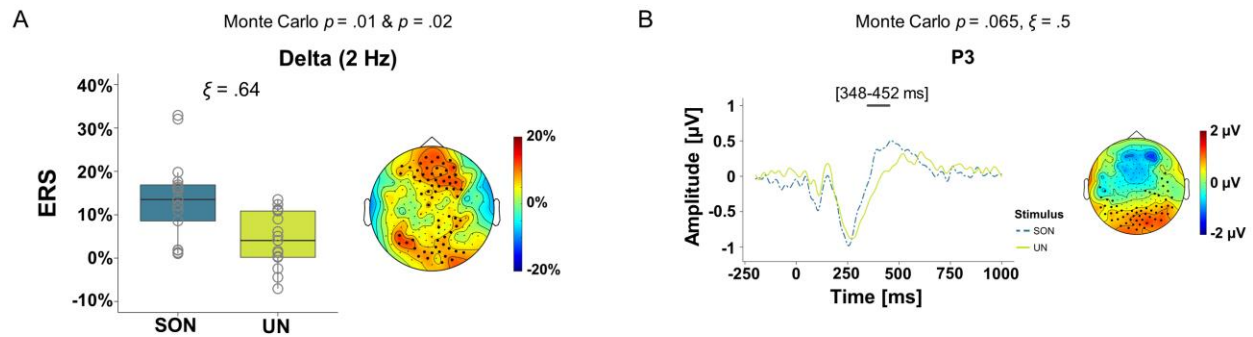

267

268

269

270

271

272

273

274

275

276

277

278

279

280

281

282

283

284

285

286

**Fig. 2: Event-Related Responses during Wakefulness.** (A) Responses in the delta (1-3 Hz) range. Box plots for the effect of *name* (left) and corresponding scalp plot of differences in ERS between SONs and UNs (right). In box plots, the bold horizontal line corresponds to the median, the lower and upper hinges correspond to the 25<sup>th</sup> and 75<sup>th</sup> percentile and the whiskers extend to the lowest/highest values within  $1.5 \times$  the interquartile ranges. Open grey circles indicate individual participants' values. Large black dots indicate the electrodes that are part of the significant clusters at 2 Hz. We report  $\xi$  as an estimate of the effect size, with .1, .3 and .5 denoting small, medium and large effects, respectively. Please note that for illustration purposes we show the effects at a representative frequency (i.e. 2 Hz) although significant clusters may have comprised a larger frequency range (see main text and Suppl. Fig. 6). (B) Event-related P3 response. Left: Grand average of the ERP elicited by SONs and UNs during wakefulness at all electrodes that were part of the cluster (see scalp plot). The horizontal grey line represents the time window during which the effect was significant (348 to 452ms). Right: Scalp plot of the difference in the ERPs evoked by SONs and UNs. Large black dots indicate electrodes that were part of the cluster with a trend to significance. SON = subject's own name, UN = unfamiliar name. Analyses and figures are based on data from  $n = 17$  participants.

In the theta, alpha and sigma bands (4-15 Hz), the analyses yielded no significant effects (*voice*: *Monte Carlo ps* > 0.62; *name*: *Monte Carlo ps* > 0.24; *name*  $\times$  *voice*: *Monte Carlo ps* > 0.4).

### 3.2. Sleep

287 Analysis of the sleep staging results revealed that the median of the total sleep time (TST) during  
288 the experimental night was 430.5 minutes (range 300-481.5 min). Wakefulness after sleep onset (WASO)  
289 had a median of 20 minutes (range 3.5-110 min). The total number of awakenings varied between 5 and  
290 25 with a median of 15. SOL to N2 was characterised by a median of 20 minutes (range 10-107.5 min),  
291 and SOL to REM had a median of 92.5 minutes (range 68.5-228 min). Regarding sleep architecture  
292 participants had a median of 7.2% N1 sleep (range 2.7-13.7%), a median of 37% N2 sleep (range 23-  
293 54.4%), a median of 34.2% N3 sleep (range 16.5-46.1%) and a median of 18.9% REM sleep (range 12.2-  
294 45.1%).

295

### 296 3.2.1. “Enduring Brain State” Analyses

#### 297 3.2.1.1. N1 sleep

298 During light N1 sleep, analyses of data from all 17 participants yielded a significant main effect  
299 of *voice* in delta (1-3 Hz) ERS (*Monte Carlo*  $p < .001$ ). Here, UFV stimuli elicited stronger delta ERS  
300 than FV stimuli in a cluster that spanned large areas of the scalp with a frontal-central focus (see Fig. 3A  
301 and Suppl. Fig. 7A). There were no further significant stimulus-induced differences in the delta range  
302 (*name*:  $p > .21$ ; *name*  $\times$  *voice*: no significant clusters). Analyses of responses in the theta, alpha and sigma  
303 bands (4-15 Hz) also yielded a significant effect of *voice* (*Monte Carlo*  $p = .003$ ; see Fig. 3C and Suppl.  
304 Fig. 7D). Here, UFV stimuli elicited considerable ERS in the theta through sigma frequency range in all  
305 time windows analysed (T1-T6: 4-15 Hz). Analyses did not show a significant effect of *name* (*Monte*  
306 *Carlo*  $ps > .26$ ), but a trend towards a *name*  $\times$  *voice* interaction (*Monte Carlo*  $p = .055$ ) with UFV stimuli  
307 eliciting stronger ERS irrespective of the name that was presented, i.e. SON or UN, ~~thus confirming the~~  
308 ~~main effect of voice~~. The effects of *voice* were also confirmed by ERP analyses with a stronger positive  
309 (92-428ms) and negative component (440-996ms) for UFV as compared to FV (see Suppl. Fig. 2A).

## FAMILIARITY OF VOICE

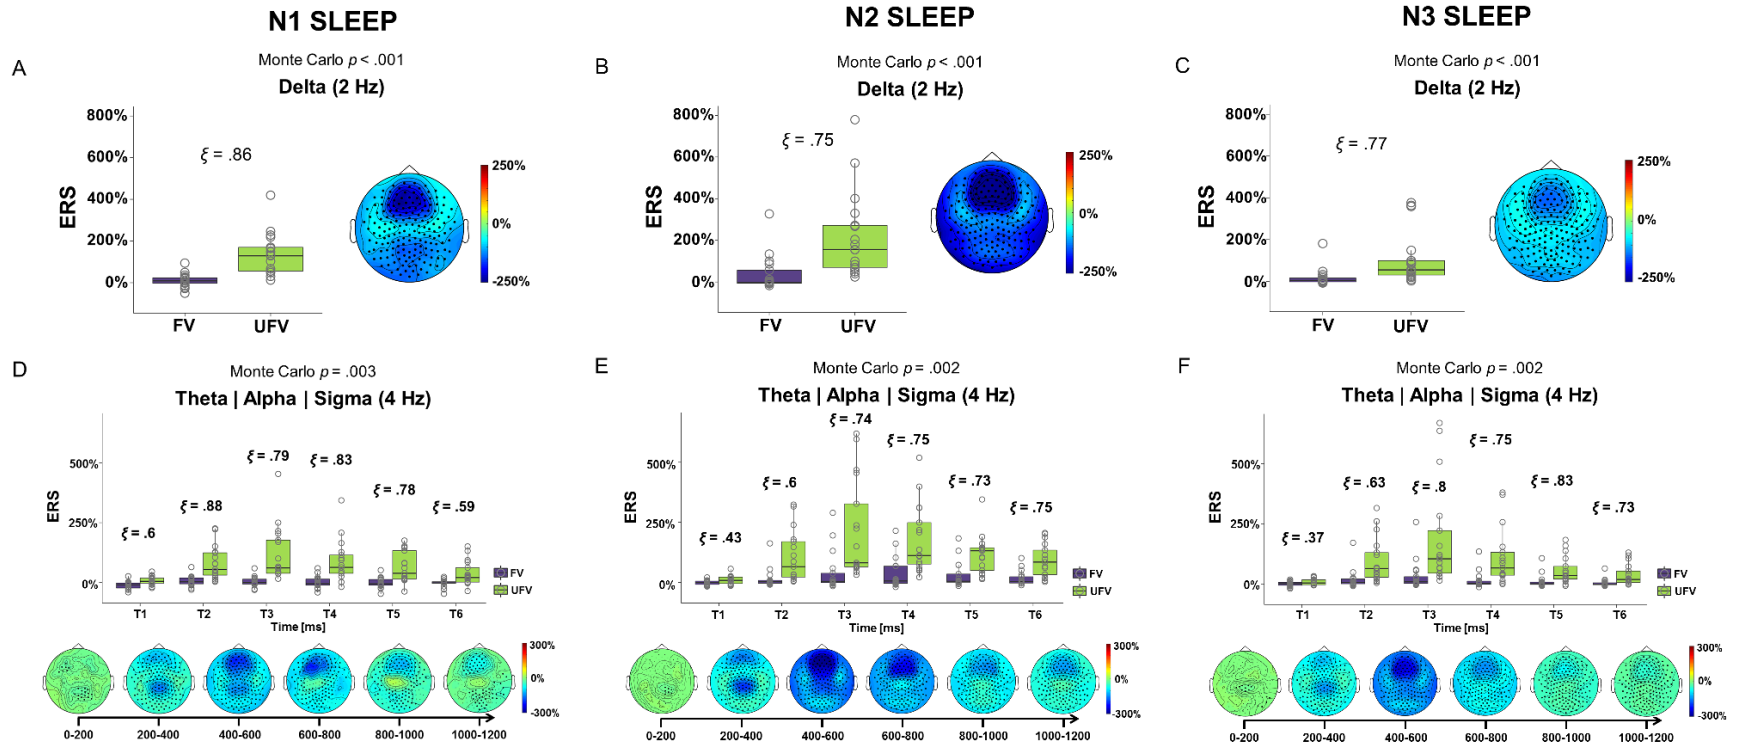

311

312

313

314

315

**Fig. 3: Event-related responses during NREM sleep.** (A, B, C): Event-related responses in the delta range (1-3 Hz) during N1, N2 and N3. Box plots for the effect of *voice* (left) and corresponding scalp plots of differences in ERS between FV and UFV (right). (D, E, F) Event-related responses in the theta/alpha/sigma range (4-15 Hz) during N1, N2 and N3. Box plots for the effect of *voice* during the six time windows (top) and corresponding scalp plots of differences in ERS/ERD between FV and UFV stimuli (bottom). In box plots, the bold horizontal line corresponds to the median, the lower and upper hinges

316 correspond to the 25<sup>th</sup> and 75<sup>th</sup> percentile and the whiskers extend to the lowest/highest values within  $1.5 \times$  the interquartile ranges. The open circles are  
317 individual participants' values. We report  $\xi$  as an estimate of the effect size, with .1, .3 and .5 denoting small, medium and large effects, respectively. Large black  
318 dots indicate the electrodes that are part of the significant clusters. Please note that for illustration purposes we show the effects at representative frequencies (i.e.  
319 2 and 4 Hz) although significant clusters may have comprised a larger frequency range (see main text and Suppl. Fig. 7). FV = familiar voice, UFV = unfamiliar  
320 voice. Analyses and figures are based on data from  $n = 17$  participants.

321 3.2.1.2. N2 sleep

322 Analyses of data from all 17 participants in the delta range yielded a significant effect of *voice* ( $p$   
323  $< .001$ ) with a cluster covering the whole scalp. Specifically, UFV stimuli elicited stronger delta ERS than  
324 FV stimuli for all frequencies between 1 and 3 Hz. The (fronto-central) topography was comparable to the  
325 N1 effect of *voice* in the delta range (see Fig. 3A, 2B and Suppl. Fig. 7 A and B). Analyses did not yield  
326 an effect of *name* or a *name*  $\times$  *voice* interaction (*Monte Carlo*  $ps > .18$  and *no clusters*, respectively). In  
327 the theta to sigma range (4-15 Hz), analyses also revealed a significant effect of *voice* (*Monte Carlo*  $p =$   
328  $.002$ ). Here, again UFV stimuli elicited strong ERS between 4 and 15 Hz following about 200ms while  
329 FV stimuli elicited much less ERS (T1: 4-7 & 15 Hz; T2-T6: 4-15 Hz). The topography and time course  
330 was comparable to the N1 effect (see Fig. 3D, Suppl. Fig. 1D and Suppl. Fig. 7E). Besides this, analyses  
331 showed no effect of *name* (*Monte Carlo*  $ps > .16$ ) and no *name*  $\times$  *voice* interaction (*Monte Carlo*  $ps >$   
332  $.34$ ). The effects of *voice* in oscillatory analyses were also confirmed by ERP analyses (see Suppl. Fig.  
333 2B).

334

335 3.2.1.3. N3 sleep

336 During N3 sleep, analyses of data from all 17 participants revealed a significant effect of *voice*  
337 (*Monte Carlo*  $p < .001$ ) in the delta range (1-3 Hz). UFV stimuli gave rise to stronger delta ERS than did  
338 FV stimuli in a cluster covering large areas of the scalp. Again, the topography was comparable to the  
339 results obtained in N1 and N2 (see Fig. 3A-C and Suppl. Fig. 7A-C). Analyses did not reveal any  
340 stimulus-induced differences for the *name* effect (no clusters) or the *name*  $\times$  *voice* interaction (no clusters)  
341 in the delta range. Analyses in the theta to sigma range (4-15 Hz) revealed a significant effect of *voice*  
342 (*Monte Carlo*  $p = .002$ ; T1: 4-9 & 15 Hz; T2-6: 14-15 Hz). Here, UFV stimuli elicited stronger ERS than  
343 did FV stimuli, an effect that was especially pronounced between about 200 and 1200ms following  
344 stimulus onset in a cluster that spanned more or less the whole scalp. Also here, the time course and  
345 topography was comparable to the results obtained during N1 and N2 (cf. Fig. 3D-F and Suppl. Fig. 7D-



346 F). Analyses did not yield any other significant effects (*name: Monte Carlo ps* > .23; *name* × *voice*:  
 347 *Monte Carlo ps* > .31). Analyses of ERPs confirmed the effects of *voice* (see Suppl. Fig. 2C).

348

#### 349 3.2.1.4. REM sleep

350 Analyses of REM sleep in all 17 participants yielded a significant effect of *voice* in the delta  
 351 range (1-3 Hz, *Monte Carlo p* = .018, see Fig. 4A and Suppl. Fig. 8A). As during N1-N3, FV stimuli  
 352 were associated with stronger delta ERS between 1 and 2 Hz than were UFV. There were no further  
 353 stimulus-induced differences in delta ERS/ERD (*name: Monte Carlo ps* > .18; *name* × *voice* interaction:  
 354 *Monte Carlo ps* > .17). Analyses in the theta to sigma range (4-15 Hz) yielded a significant *voice* effect  
 355 (*Monte Carlo p* = .006, see Fig. 4B and Suppl. Fig. 8B). Here, UFV stimuli elicited stronger ERS than  
 356 FV stimuli following about 200ms. The effect mainly covered the alpha through sigma range (T1: 5 Hz;  
 357 T2: 4-15 Hz; T3: 5-6 & 12-15 Hz; T4/5: 8-15 Hz; T6: 9-15 Hz) and was most pronounced at the central  
 358 and centroparietal electrodes. Generally, effects during REM were much less pronounced and delayed  
 359 compared to the NREM sleep stages. Analyses did not yield any further significant effects (*name: Monte*  
 360 *Carlo ps* > .37; *name* × *voice: Monte Carlo ps* > .32).

## FAMILIARITY OF VOICE REM SLEEP

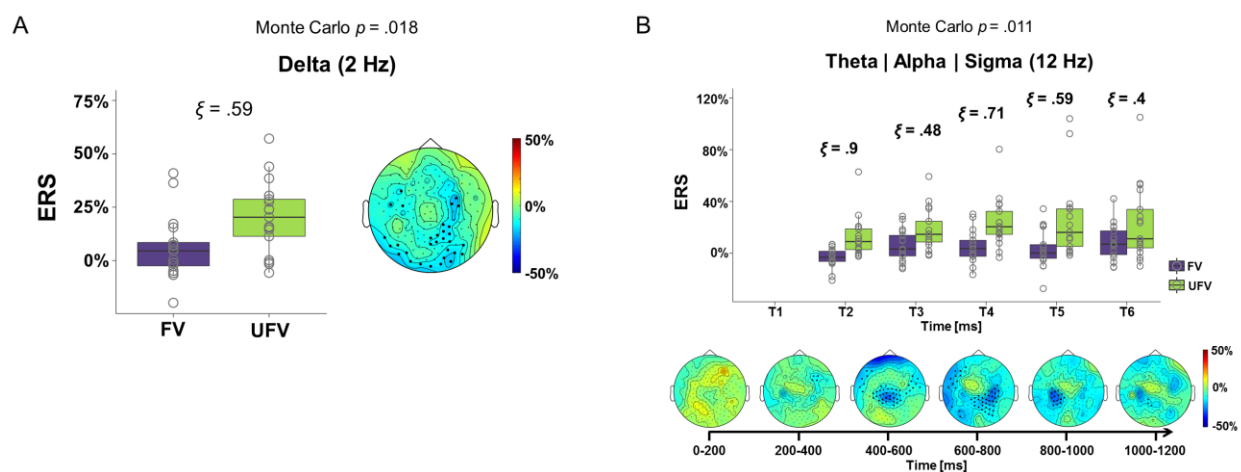

361

362 **Fig. 4: Event-related responses during REM sleep.** (A) Event-related responses in the delta (1-3 Hz)  
363 range. Box plots for the effect of *voice* (left) and corresponding scalp plot of differences in ERS between FV and  
364 UFV (right). Large black dots indicate the electrodes that are part of the significant cluster at 2 Hz. (B) Event-related  
365 responses in the theta/alpha/sigma (4-15 Hz) range. Box plots for the effect of *voice* during the six time windows  
366 (top) and corresponding scalp plots of differences in ERS/ERD between FV and UFV stimuli (bottom). In box plots,  
367 the bold horizontal line corresponds to the median, the lower and upper hinges correspond to the 25<sup>th</sup> and 75<sup>th</sup>  
368 percentile and the whiskers extend to the lowest/highest values within  $1.5 \times$  the interquartile ranges. Open grey  
369 circles indicate individual participants' values. We report  $\xi$  as an estimate of the effect size, with .1, .3 and .5  
370 denoting small, medium and large effects, respectively. Large black dots indicate the electrodes that are part of the  
371 cluster at 12 Hz. Please note that for illustration purposes we show the effects at representative frequencies (i.e. 2  
372 and 12 Hz) although significant clusters may have comprised a larger frequency range (see main text and Suppl. Fig.  
373 8). FV = familiar voice, UFV = unfamiliar voice. Analyses and figures are based on data from  $n = 17$  participants.

374

### 375 3.2.2. "Transient Brain State"- Analyses

#### 376 3.2.2.1. Sleep Spindle vs. No Spindle

377 In both conditions, analyses of ERD/ERS of data from  $n = 14$  participants revealed significant  
378 effects of *voice* in the delta range ("spindle" condition [S+]: *Monte Carlo*  $p = .005$ ; 1-3 Hz, see Fig. 4A  
379 and Suppl. Fig. 10A and "no spindle" condition [S-]: *Monte Carlo*  $p = .006$ ; 1-3 Hz, cf. Fig. 4B and  
380 Suppl. Fig. 10B) with UFV stimuli eliciting stronger delta ERS than FV stimuli. Post hoc analyses  
381 indicated that in the delta range stimulus presentation did not elicit more ERS in the S- compared to the  
382 S+ condition (*Monte Carlo*  $ps > .11$ ). In the S- condition there was also a significant effect of name in the  
383 delta range (*Monte Carlo*  $p = .024$ , 1-3 Hz) with unfamiliar names (UNs) eliciting stronger ERS than the  
384 participant's own name (SON). There were no further effects in the delta range in either condition (S+:  
385 *name*: *Monte Carlo*  $p = .14$ ; *name*  $\times$  *voice*: *Monte Carlo*  $p > .22$ ; S-: *name*  $\times$  *voice*: *Monte Carlo*  $p > .49$ ).  
386 In the theta to sigma range (4-15 Hz) there were also significant effects of *voice* in both the "spindle" and  
387 the "no spindle" conditions (S+: *Monte Carlo*  $p = .005$ , T1: 4-7 Hz; T2/3: 4-14 Hz; T4: 4-13 Hz; T5: 4-14

388 Hz, T6: 4-15 Hz, see Figs. 4C and E and Suppl. Fig. 10C; S-: *Monte Carlo*  $p = .007$ , T1: 4 Hz; T2-6: 4-15  
389 Hz, see Figs. 4D and F and Suppl. Fig. 10D). Interestingly, the topography and time course of the effects  
390 in the “no spindle” condition were only comparable to the results in the “spindle” condition in the slower  
391 frequencies up to about 9 Hz. While in the slower frequencies UFV stimuli elicited stronger ERS than FV  
392 stimuli, in the faster frequencies (10-15 Hz), FV stimuli were specifically associated with a marked ERD  
393 in the “spindle” condition only (condition differences: *Monte Carlo*  $p < .001$ , T1/2: not part of the cluster,  
394 T3: 10-15 Hz, T4/5: 9-15 Hz, T6: 8-15 Hz; diamonds in Figs. 4E and F indicate time windows where  
395 stimulus-evoked responses were stronger in the S- condition). Analyses did not yield any further  
396 significant differences in the theta to sigma range (S+: *name*: *Monte Carlo*  $ps > .7$  and *name*  $\times$  *voice*:  
397 *Monte Carlo*  $ps > .39$ ; S-: *name*: *Monte Carlo*  $ps > .32$ ; *name*  $\times$  *voice*: *Monte Carlo*  $ps > .49$ ). ERP  
398 analyses showed a significant effect of *voice* that corresponded to the effects in the oscillatory analyses  
399 only in the “spindle” condition (see Suppl. Fig. 3).

400

## FAMILIARITY OF VOICE

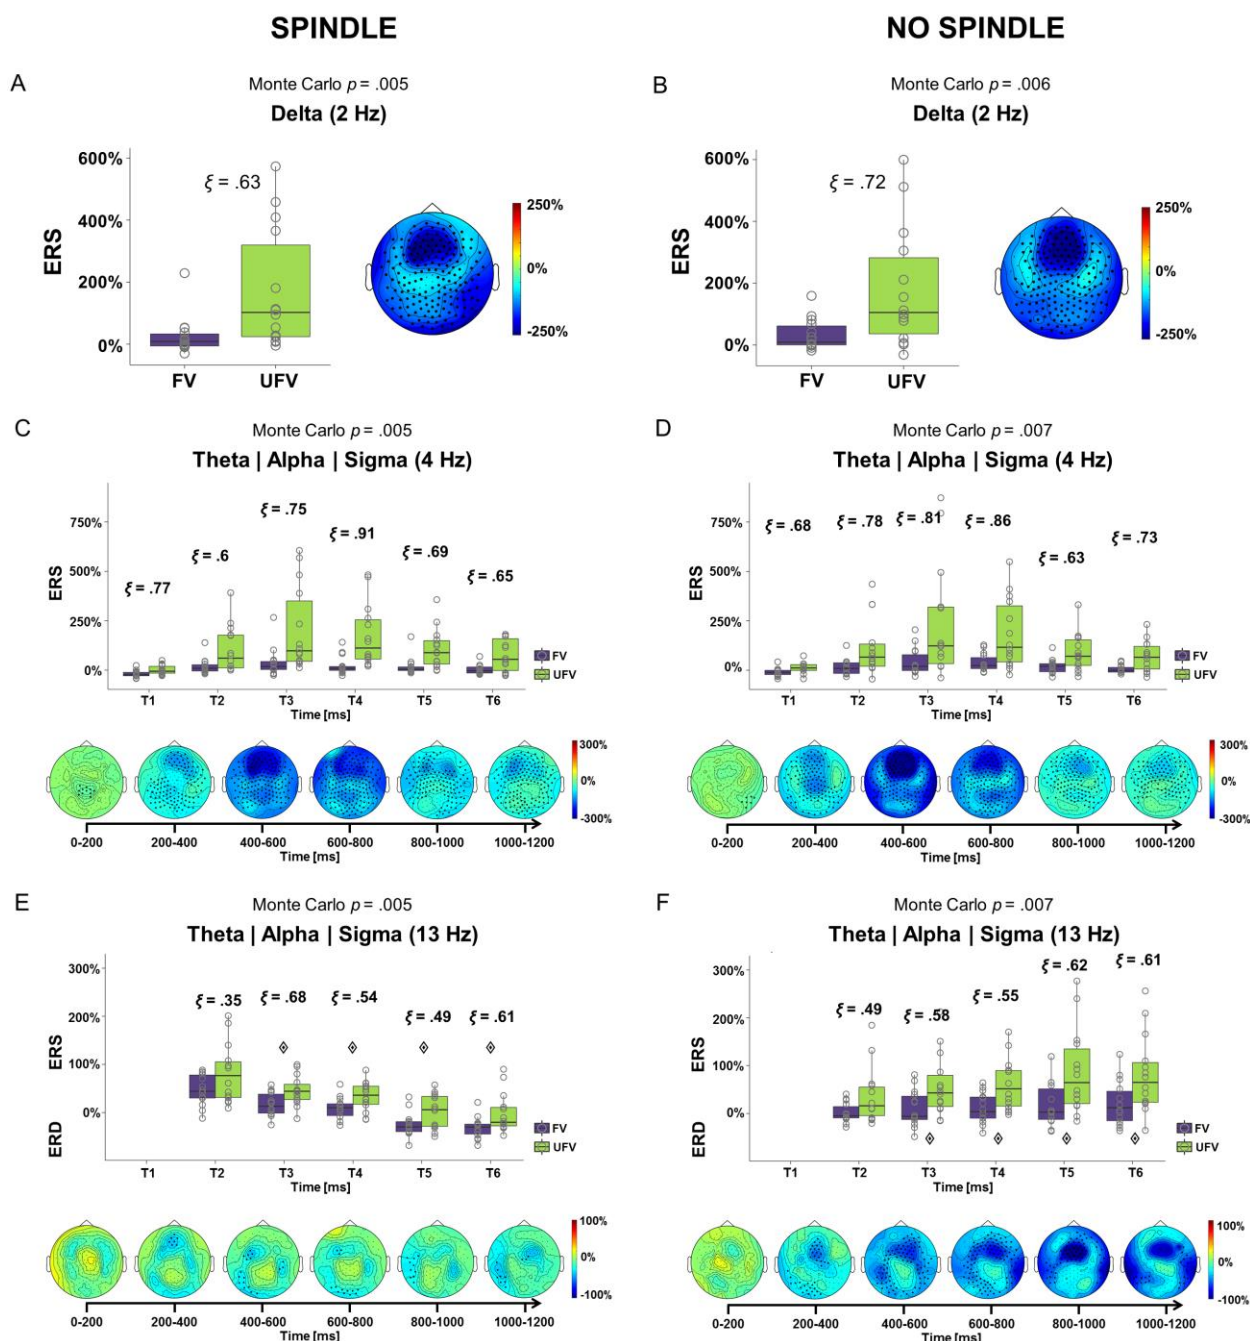

401  
402 **Fig. 5: Event-related responses during N2/N3 sleep depending on the presence/absence of sleep spindles. (A,**  
403 **B) Event-related responses in the delta (1-3 Hz) range. Box plots for the effect of *voice* (left) and corresponding**  
404 **scalp plot of differences in ERS between FV and UFV (right). (C, D) Event-related responses in the**  
405 **theta/alpha/sigma (4-15 Hz) range at 4 Hz and (E, F) responses at 13 Hz. Box plots for the effect of *voice* during the**

406 six time windows (top) and corresponding scalp plots of differences in ERS/ERD between FV and UFV stimuli  
407 (bottom). In box plots, the bold horizontal line corresponds to the median, the lower and upper hinges correspond to  
408 the 25<sup>th</sup> and 75<sup>th</sup> percentile and the whiskers extend to the lowest/highest values within  $1.5 \times$  the interquartile ranges.  
409 Open grey circles indicate individual participants' values. Diamonds in figures E and F indicate the time windows  
410 with significant differences between S+ and S- conditions at 13 Hz. We report  $\xi$  as an estimate of the effect size,  
411 with .1, .3 and .5 denoting small, medium and large effects, respectively. Large black dots indicate the electrodes  
412 that are part of the clusters at 2 Hz, 4 Hz or 13 Hz, respectively. Please note that for illustration purposes we show  
413 the effects at representative frequencies (i.e. 2, 4 and 13 Hz) although significant clusters may have comprised a  
414 larger frequency range (see main text and Suppl. Fig. 10). A spindle could either be present during stimulus onset  
415 (i.e. spindle offset min. 200ms after stimulus onset) or it could have a substantial overlap with stimulus presentation  
416 (spindle onset 0-400ms after stimulus onset). For more details please see supplementary material. FV = familiar  
417 voice, UFV = unfamiliar voice. Analyses and figures are based on data from  $n = 14$  participants.

418

#### 419 3.2.2.2. *Stimulus Presentation along Slow Oscillation Positive vs. Negative Slope*

420 Irrespective of the slope of a SO during which a stimulus was presented, analyses of data from  $n$   
421 = 17 participants yielded significant effects of *voice* (pos. slope: *Monte Carlo*  $p = .001$ ; see Fig. 6A and  
422 Suppl. Fig. 11A, neg. slope: *Monte Carlo*  $p = .002$ , see Fig. 6B and Suppl. Fig. 11B) in the delta range.  
423 Specifically, like in the other conditions UFV stimuli elicited stronger ERS than did FV stimuli between 1  
424 and 3 Hz in clusters spanning large parts of the scalp. However, in the positive SO slope condition  
425 stimulus presentation and in particular UFV stimuli elicited significantly larger responses than in the  
426 negative SO slope condition at 1 Hz (*Monte Carlo*  $p < .02$ ). No further effects were evident in the delta  
427 range (pos. slope: *name*: *Monte Carlo*  $p = .11$ ; *voice*  $\times$  *name*: no clusters; neg. slope: *name*: *Monte Carlo*  
428  $p = .15$ ; *voice*  $\times$  *name*: *Monte Carlo*  $p > .17$ ). In the theta to sigma range (4-15 Hz) analyses also  
429 revealed significant effects of *voice* in both conditions (pos. slope: *Monte Carlo*  $p < .001$ , see Fig. 6C and  
430 Suppl. Fig. 11C; neg. slope: *Monte Carlo*  $p = .004$ , see Fig. 6D and Suppl. Fig. 11D) with UFV stimuli  
431 eliciting stronger ERS than FV stimuli following about 200ms in a broad frequency range comparable to

432 the effects in the other conditions regarding topography and time course (pos. slope: T1: 13-15 Hz; T2-6:  
 433 4-15 Hz; neg. slope: T1: 4-11 Hz; T2-6: 4-15 Hz). There were significant differences between the positive  
 434 and negative SO slope conditions (*Monte Carlo ps* < .009) with stimulus presentation eliciting stronger  
 435 responses in the positive SO slope condition beyond about 200ms. The effects of *voice* were also  
 436 confirmed by ERP analyses (pos. slope: see Suppl. Fig. 4B; neg. slope: see Suppl. Fig. 4C). There were  
 437 no further effects in the theta through sigma range (pos. slope: *name: Monte Carlo ps* > .30; *name* ×  
 438 *voice: Monte Carlo ps* > .28; neg. slope: *name: Monte Carlo ps* > .20; *name* × *voice: Monte Carlo ps* >  
 439 .12).

## FAMILIARITY OF VOICE

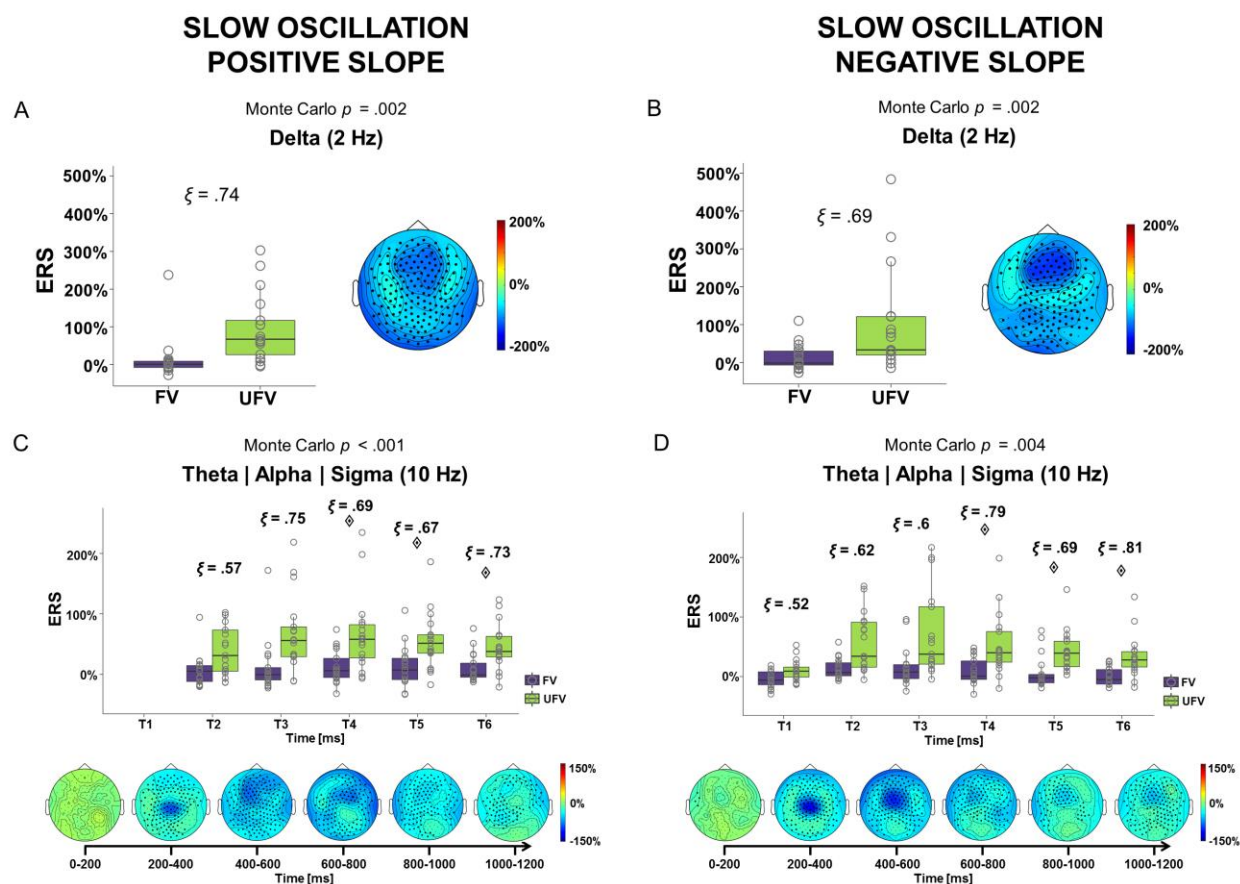

440  
 441 **Fig. 6: Event-related responses during N2/N3 sleep when a stimulus was presented along the positive**  
 442 **vs. negative slope of the SO. (A, B) Event-related responses in the delta (1-3 Hz) range. Box plots for the effect of**  
 443 **voice (left) and corresponding scalp plots of differences in ERS between FV and UFV (right). (C, D) Event-related**

444 responses in the theta/alpha/sigma (4-15 Hz) range. Box plots for the effect of *voice* during the six time windows  
445 (top) and corresponding scalp plots of differences in ERS/ERD between FV and UFV stimuli (bottom). In box plots,  
446 the bold horizontal line corresponds to the median, the lower and upper hinges correspond to the 25<sup>th</sup> and 75<sup>th</sup>  
447 percentile and the whiskers extend to the lowest/highest values within  $1.5 \times$  the interquartile ranges. Open grey  
448 circles indicate individual participants' values. We report  $\xi$  as an estimate of the effect size, with .1, .3 and .5  
449 denoting small, medium and large effects, respectively. Diamonds indicate time windows during which stimulus-  
450 induced differences were more pronounced in the positive SO slope condition. Large black dots indicate the  
451 electrodes that are part of the significant clusters. Please note that for illustration purposes we show the effects at  
452 representative frequencies (i.e. 2 and 10 Hz) although significant clusters may have comprised a larger frequency  
453 range (see main text and Suppl. Fig. 11). FV = familiar voice, UFV = unfamiliar voice. Analyses and figures are  
454 based on data from  $n = 17$  participants.

455

456

457

#### 458 **4. Discussion**

459 In this study we show that especially processing of paralinguistic emotional aspects of verbal  
460 stimuli such as the familiarity of a voice is even possible during fading and in the absence of  
461 consciousness defined as behavioural responsiveness during sleep. The findings add to existing evidence  
462 that the detection and evaluation of meaningful stimuli is still possible in these states (e.g. Perrin et al.,  
463 1999; Portas et al., 2000). Intriguingly, we do not only find that a differential response to familiar vs.  
464 unfamiliar voice (FV vs. UFV) stimuli persists during light NREM sleep stages N1 and N2 thus  
465 replicating previous results (cf. Blume et al., 2016; Perrin et al., 1999), but we extend this finding to deep  
466 N3 and also REM sleep. Beyond this, we show that transient brain states, which have been suggested to  
467 alter sensory information processing during sleep, i.e. sleep spindles (Cote et al., 2000; Elton et al., 1997;  
468 Schabus et al., 2012) and slow oscillation down-states (Massimini et al., 2003; Schabus et al., 2012), do,  
469 at least not uniformly or irrespective of stimulus characteristics, inhibit stimulus processing. Rather, their  
470 inhibitory function seems to be tuned to stimulus salience.

471 During wakefulness, SONs seemed to be salient when compared to UNs thus drawing more  
472 attentional resources. This was indicated by SONs eliciting stronger delta ERS than UNs across large  
473 areas of the scalp. Functionally, delta ERS has repeatedly been linked to attentional processes and the  
474 detection of salient or motivationally relevant stimuli (for reviews see Knyazev, 2007; Knyazev, 2012).  
475 Additionally, this is well in line with the relatively larger P3 component evident in ERP analyses, which  
476 has likewise been associated with attention and stronger processing, as well as results from earlier studies  
477 (e.g. Berlad & Pratt, 1995; Blume et al., 2016; Perrin et al., 1999). In an earlier study from our group, del  
478 Giudice et al. (2014) had also found stronger alpha ERD for SONs than for UNs, which we could not  
479 replicate here. This may ultimately be due to methodological differences and the more conservative  
480 statistical analysis methods employed here. Somewhat surprisingly, no differences were evident between  
481 FV and UFV stimuli when participants were awake, although earlier studies had reported differential  
482 effects on ERPs (Beauchemin et al., 2006; Holeckova et al., 2006). Also here, methodological differences



483 may account for the deviating findings. Nevertheless it should be noted that we experience situations in  
484 which voices of varying degrees of familiarity are present along with unfamiliar voices every day. From  
485 this perspective, one may speculate whether the lack of a differential response evoked by voice familiarity  
486 may even indicate adaptive processing mechanisms precluding the mere presence of familiar voices from  
487 interfering with targeted attentional processes.

488         During NREM sleep, that is from light N1 to deep N3 sleep, we consistently find that processing  
489 of FV vs. UFV stimuli gives rise to a differential response in the delta to sigma frequency range, an effect  
490 that is present in oscillatory analyses as well as ERPs. Most importantly, this provides support for the  
491 notion that processing of auditory stimuli and especially of paralinguistic stimulus aspects such as the  
492 familiarity of a voice is incessantly processed even in states where consciousness is absent. While this is  
493 well in line with earlier findings during light sleep stages N1 and N2 (e.g. Blume et al., 2016; Oswald et  
494 al., 1960; Portas et al., 2000), our results suggest that the same holds true even for deep N3 sleep. Thus,  
495 the findings also support the notion of a ‘sentinel processing mode’ of the brain during sleep, which we  
496 suggested in a previous publication (cf. Blume et al., 2016). Specifically, this mode describes the idea that  
497 (low-level) stimulus evaluation continues even when consciousness fades during sleep and the result of  
498 this evaluation may subsequently either trigger an inhibitory sleep-protecting response or awakening. In  
499 detail, we here find UFV stimuli to be associated with stronger ERS in the delta range than FV stimuli  
500 during all NREM sleep stages, an effect which was widespread across the scalp with the response being  
501 most pronounced above frontocentral areas. Adopting the interpretation of delta oscillations during  
502 wakefulness, the results suggest that UFV stimuli may become salient when consciousness fades  
503 (Knyazev, 2007, 2012). In particular, the presence of unfamiliar voices could challenge the impression of  
504 a safe environment that is necessary to ‘let go of consciousness’ and eventually fall and stay asleep,  
505 rendering them salient. However, the increase in delta ERS visible in oscillatory analyses could also  
506 reflect a sleep-specific event-related pattern, namely an evoked slow oscillatory or K-complex-like  
507 response. Like slow oscillations (SOs), K-complexes (KCs) have their peak frequency is in the delta

508 range and they are considered ‘forerunners’ of SOs or ‘sub-threshold SOs’ (e.g. Amzica & Steriade, 1997;  
509 De Gennaro et al., 2000), which are often evoked by acoustic stimulation (Bellesi et al., 2014). While  
510 KCs are strongly associated with N2 sleep, SOs are considered the hallmark of N3 sleep. Functionally,  
511 evoked slow waves (i.e. KCs and SOs), have been suggested to serve cortical excitation and low-level  
512 information processing as well as the subsequent protection of sleep by neuronal silencing (Cash et al.,  
513 2009; Dang-Vu et al., 2011; Laurino et al., 2014). Although they also occur spontaneously, especially  
514 KCs have been found to be elicited particularly by salient or high-intensity stimuli (e.g. Bastien &  
515 Campbell, 1992). In line with the notion that evoked slow waves indicate ongoing cognitive processing,  
516 Vallat et al. (2017) have recently reported a KC/SO-like response during N2 sleep that was stronger for  
517 auditory stimuli that were followed by an arousal or awakening. The authors concluded that this reflects  
518 stronger reactivity of the brain to external stimuli, which in turn leads to stronger arousal. In accordance  
519 with this, ERP analyses of our data indicated that stimulus-induced differences in the delta range indeed  
520 reflected KC/SO-like responses evoked by stimulus presentation with considerably larger amplitudes for  
521 UFV stimuli. In line with earlier ideas, we suggest that this ERP reflects increased (low-level)  
522 information processing of especially salient UFV stimuli (indexed by a larger positive wave), which is  
523 then followed by an inhibitory or sleep-protecting ‘down-state’ (indexed by a larger negative wave) that is  
524 likewise scaled to stimulus salience. Further support for this interpretation comes from analyses when we  
525 explicitly looked at stimulus presentations that evoked an SO, with evoked SOs also seeming to be  
526 sensitive to stimulus salience. Also here, UFV stimuli were associated with stronger delta through sigma  
527 activity than FV stimuli and ERP analyses revealed that UFV stimuli were associated with a very slight  
528 positive-going wave, which was followed by a SO down-state that appeared much more pronounced for  
529 UFV stimuli (cf. Suppl. Fig. 4A). Besides the results obtained in the delta range, we also find that during  
530 all NREM sleep stages UFV stimuli are associated with stronger ERS in the theta through sigma range  
531 than FV stimuli, an effect which is most pronounced following about 200ms after stimulus onset. Most  
532 importantly, these findings are well in line with the delta results and they provide further convincing

533 support for the notion that the brain is still able to process paralinguistic stimulus aspects even when  
534 consciousness fades and is absent. On a functional level, especially frequencies in the alpha and sigma  
535 range are thought to mirror an increase in arousal during sleep (cf. American Academy of Sleep Medicine  
536 & Iber, 2007). This suggests that UFV stimuli may be more arousing than FV stimuli during NREM  
537 sleep, an interpretation that, also given the observed KC/SO-like response, is well in line with Vallat et  
538 al.'s results. As suggested above, the presence of unfamiliar voices may challenge the impression of an  
539 environment 'safe to sleep' and thus be arousing. Admittedly, our findings during N2 sleep partly contrast  
540 results of earlier studies, where the brain also seemed to continue differentiating between UNs and SONs  
541 (e.g. Blume et al., 2016; Perrin et al., 1999). The deviating findings are likely to be due to methodological  
542 differences. Additionally, it should be noted that in the present study participants slept during a whole  
543 night and not just an afternoon nap (cf. Blume et al., 2016) with differences in the homeostatic and  
544 circadian factors rendering it questionable whether a daytime nap can be considered a short night sleep  
545 equivalent (Dijk & Czeisler, 1995; van Schalkwijk et al., 2017).

546 In summary, results obtained during wakefulness and NREM sleep suggest that familiarity of a  
547 voice can be processed even during the fading of consciousness (N1) and in the full absence of  
548 (behavioural) consciousness (N2 and N3). For REM sleep, a paradoxical state characterised by (i) the  
549 return of 'altered consciousness', namely 'dreaming' (although note that dreams are not limited to REM  
550 sleep, cf. e.g. Siclari et al., 2017), (ii) enhanced brain metabolism compared to wakefulness (Nofzinger et  
551 al., 1997) and (iii) an increase in higher frequency EEG power (Uchida et al., 1992), we also observed a  
552 relatively stronger increase in delta as well as alpha/sigma ERS elicited by UFV compared to FV stimuli,  
553 which may indicate continued processing and/or arousal of salient or potentially 'dangerous' UFV  
554 stimuli. This is especially interesting because REM sleep has been suggested to reflect a 'closed loop',  
555 that is a state in which the brain is rather occupied with intrinsic activity than processing of external  
556 stimuli (Andrillon et al., 2016; Llinás & Paré, 1991; Wehrle et al., 2007) with our results challenging this  
557 notion. At the same time, while the oscillatory response pattern was generally similar to NREM sleep

558 findings, REM responses were considerably weaker (see also Suppl. Fig. 9) and markedly delayed by  
559 approx. 400ms. This underlines the idea that brain activity and processing of environmental stimuli  
560 during REM is qualitatively different although not generally precluded. In conclusion, we consistently  
561 find that during all NREM sleep stages as well as REM sleep, the brain seems to continue differentiating  
562 between paralinguistic (emotional) aspects (i.e. familiar vs. unfamiliar voice) but not among the linguistic  
563 content of stimuli (i.e. own vs. other name; cf. Suppl. Table 1 for an overview of the results). In contrast  
564 to processing of the content, which involves higher level cognitive processes including for example  
565 memory access, processing of emotional content and the identity of a voice has been suggested to be  
566 possible also at lower levels. It has for example been reported that the identification of emotions or  
567 identity in voice occurs at very early stages of processing (emotions at about 200ms, identity at about  
568 300ms already; cf. Spreckelmeyer et al., 2009) and emotional prosody processing occurs in regions close  
569 to primary auditory regions and irrespective of the listeners' focus of attention (Grandjean et al., 2005).  
570 From this perspective, it seems that during sleep, which is characterised by the reduced availability of  
571 cognitive resources, the brain may be apt to processing of paralinguistic (emotional) stimulus  
572 characteristics.

573         Beyond investigating stimulus processing across enduring brain states, i.e. wakefulness and  
574 different sleep stages, we were also interested in how stimulus presentation relates to 'transient oscillatory  
575 activity', that is sleep spindles and slow oscillations (SOs), during N2 and N3 sleep. Generally, sleep  
576 spindles (Elton et al., 1997; Schabus et al., 2012) and the negative slope of slow oscillations (Schabus et  
577 al., 2012) have been suggested to inhibit processing of external stimuli. In line with this we find that sleep  
578 spindles as well as a negative slow oscillation slope attenuate stimulus processing (cf. Fig. 5E/F and  
579 Suppl. Fig. 4 B/C). However, this does not seem to be an all-or-none phenomenon, but rather brain  
580 responses are still tuned to stimulus salience suggesting that at least 'low-level' processing is not  
581 precluded. More specifically, we find that when a sleep spindle overlapped with stimulus presentation  
582 UFV stimuli still elicited responses in the delta through lower alpha (i.e. up to about 9 Hz) range that

583 were similar to those obtained when not taking ‘transient oscillatory activity’ into account. Intriguingly  
584 and unlike proposed earlier (Schabus et al., 2012; Steriade, 1991), this suggests that processing of  
585 external stimuli is not or at least not uniformly inhibited by the presence of a sleep spindle, i.e. spindles  
586 do not generally seem to act as a sensory filter at the thalamic level. Interestingly, this is well in line with  
587 recent findings in rodents where thalamocortical sensory relay was shown to persist even during sleep  
588 spindles (Sela et al., 2016). Beyond this, above  $\approx 9$  Hz the response pattern when a spindle was present  
589 was markedly different from the general NREM (see Fig. 3) and, most importantly, the ‘no spindle’ (see  
590 Fig. 5F) patterns with FV stimuli eliciting stronger ERD than UFV stimuli in the  $\approx 11$ -15 Hz spindle range  
591 (see Fig. 5C). We speculate that this could reflect a relatively stronger release of inhibition (reflected by  
592 10-15 Hz ERD) for seemingly less relevant FV stimuli by sleep spindles. Arguably, a selective  
593 mechanism that specifically filters information that is considered irrelevant, i.e. here FV stimuli, seems  
594 more adaptive than the uniform inhibition of all environmental stimuli. Following the idea of a ‘sentinel  
595 processing mode’ of the brain during sleep, spindles just as slow oscillations could thus reflect a sleep-  
596 protecting response that follows initial stimulus evaluation during N2 and N3. Besides sleep spindles,  
597 previous studies suggested that also the slope of a SO during stimulus presentation affects stimulus  
598 processing. In particular the negative slope has been found to be associated with decreased responses in  
599 studies using somatosensory stimuli and simple tones as compared to the positive SO slope (Dang-Vu et  
600 al., 2011; Massimini et al., 2003; Schabus et al., 2012). Surprisingly, in our study stimulus delivery  
601 during negative and positive slopes revealed similar responses with responses in both conditions being  
602 tuned to stimulus salience. Specifically, as during all other sleep stages UFV stimuli elicited stronger  
603 (delta to sigma) ERS than FV stimuli. These results were supported by ERP analyses indicating that UFV  
604 stimuli induced a more pronounced down-state that was preceded by an up-state. The findings thereby  
605 contrast earlier findings and suggest that also the negative slope of a SO does at least not uniformly  
606 inhibit information processing and allows continued evaluation of stimulus characteristics. Likewise, the

607 findings also suggest that during a positive SO slope the brain is not uniformly open to external  
608 stimulation.

609 In conclusion, this study shows that stimulus characteristics and especially the familiarity of a  
610 voice continue to be evaluated during all stages of NREM sleep and thus even in the complete absence of  
611 behavioural consciousness. Surprisingly, this is the case even during REM sleep with processing of  
612 external seeming to be slowed and decreased though. Our findings thereby provide support for the idea of  
613 a ‘sentinel processing mode’ of the brain during sleep, i.e. the continued processing of environmental  
614 stimuli even in the absence of consciousness that may then be followed by either an inhibitory sleep-  
615 protective response or awakening depending on the result of stimulus evaluation. Beyond this, it appears  
616 that even ‘transient oscillatory activity’, i.e. sleep spindles and slow oscillations are sensitive to  
617 paralinguistic emotional stimulus characteristics. Furthermore, we provide novel evidence that, although  
618 stimulus processing is generally attenuated, even during spindles and the negative slope of a SO the brain  
619 reacts differentially to incoming information. More generally, our findings also suggest that in different  
620 vigilance states processing of emotional stimuli may vary. Besides, the results may open up new  
621 perspectives for insomnia research, where a relative deficit in processing of environmental stimuli during  
622 sleep may be related to problems of ‘letting go of consciousness’ and thus falling asleep.

623

624

#### 625 *Conflict of interest*

626 The authors declare no competing financial interests.

627

#### 628 *Acknowledgements*

629 We thank Daniel Koerner and Adriana Michalak for their help with the data collection and pre-  
630 processing and Vincenzo Muto for his advice on the sleep staging. We also thank Wolfgang Klimesch for  
631 the valuable discussion of the results.

632 **References**

- 633 American Academy of Sleep Medicine, & Iber, C. (2007). *The AASM manual for the scoring of sleep and*  
634 *associated events: rules, terminology and technical specifications*: American Academy of Sleep  
635 Medicine.
- 636 Amzica, F., & Steriade, M. (1997). The K-complex: Its slow (<1- Hz) rhythmicity and relation to delta  
637 waves. *Neurology*, 49(4), 952-959. doi:10.1212/wnl.49.4.952
- 638 Anderer, P., Gruber, G., Parapatics, S., Woertz, M., Miazhyńska, T., Klösch, G., . . . Danker-Hopfe, H.  
639 (2005). An E-health solution for automatic sleep classification according to Rechtschaffen and  
640 Kales: validation study of the Somnolyzer 24× 7 utilizing the Siesta database.  
641 *Neuropsychobiology*, 51(3), 115-133.
- 642 Anderer, P., Moreau, A., Woertz, M., Ross, M., Gruber, G., Parapatics, S., . . . Dorffner, G. (2010).  
643 Computer-Assisted Sleep Classification according to the Standard of the American Academy of  
644 Sleep Medicine: Validation Study of the AASM Version of the Somnolyzer 24 × 7.  
645 *Neuropsychobiology*, 62(4), 250-264.
- 646 Anderer, P., Saletu, B., Saletu-Zyhlarz, G. M., Gruber, G., Parapatics, S., Miazhyńska, T., . . . Dorffner,  
647 G. (2004). Recent advances in the electrophysiological evaluation of sleep. Essentials and  
648 applications of EEG research in preclinical and clinical pharmacology. Berlin: Unipublish Verlag  
649 für Studium & Praxis OHG, 307-339.
- 650 Andrillon, T., Poulsen, A. T., Hansen, L. K., Léger, D., & Kouider, S. (2016). Neural Markers of  
651 Responsiveness to the Environment in Human Sleep. *The Journal of Neuroscience*, 36(24), 6583-  
652 6596. doi:10.1523/jneurosci.0902-16.2016
- 653 Bastien, C., & Campbell, K. (1992). The evoked K-complex: all-or-none phenomenon? *Sleep*, 15(3), 236-  
654 245.
- 655 Bastuji, H., & García-Larrea, L. (1999). Evoked potentials as a tool for the investigation of human sleep.  
656 *Sleep medicine reviews*, 3(1), 23-45. doi:[http://dx.doi.org/10.1016/S1087-0792\(99\)90012-6](http://dx.doi.org/10.1016/S1087-0792(99)90012-6)

- 657 Beauchemin, M., Beaumont, L. D., Vannasing, P., Turcotte, A., Arcand, C., Belin, P., & Lassonde, M.  
658 (2006). Electrophysiological markers of voice familiarity. *European Journal of Neuroscience*,  
659 23(11), 3081-3086. doi:doi:10.1111/j.1460-9568.2006.04856.x
- 660 Bellesi, M., Riedner, B. A., Garcia-Molina, G. N., Cirelli, C., & Tononi, G. (2014). Enhancement of sleep  
661 slow waves: underlying mechanisms and practical consequences. *Frontiers in Systems*  
662 *Neuroscience*, 8, 208. doi:10.3389/fnsys.2014.00208
- 663 Berlad, I., & Pratt, H. (1995). P300 in response to the subject's own name. *Electroencephalogr Clin*  
664 *Neurophysiol*, 96(5), 472-474.
- 665 Blume, C., del Giudice, R., Lechinger, J., Wislowska, M., Heib, D. P. J., Hoedlmoser, K., & Schabus, M.  
666 (2016). Preferential processing of emotionally and self-relevant stimuli persists in unconscious  
667 N2 sleep. *Brain Lang*. doi:<http://dx.doi.org/10.1016/j.bandl.2016.02.004>
- 668 Bullmore, E. T., Suckling, J., Overmeyer, S., Rabe-Hesketh, S., Taylor, E., & Brammer, M. J. (1999).  
669 Global, voxel, and cluster tests, by theory and permutation, for a difference between two groups  
670 of structural MR images of the brain. *IEEE Transactions on Medical Imaging*, 18(1), 32-42.  
671 doi:10.1109/42.750253
- 672 Cash, S. S., Halgren, E., Deghani, N., Rossetti, A. O., Thesen, T., Wang, C., . . . Madsen, J. R. (2009).  
673 The human K-complex represents an isolated cortical down-state. *Science*, 324(5930), 1084-  
674 1087.
- 675 Cote, K. A., De Lugt, D. R., Langley, S. D., & Campbell, K. B. (1999). Scalp topography of the auditory  
676 evoked K-complex in stage 2 and slow wave sleep. *Journal of Sleep Research*, 8(4), 263-272.
- 677 Cote, K. A., Epps, T. M., & Campbell, K. B. (2000). The role of the spindle in human information  
678 processing of high-intensity stimuli during sleep. *Journal of Sleep Research*, 9(1), 19-26.  
679 doi:10.1046/j.1365-2869.2000.00188.x



- 680 Dang-Vu, T. T., Bonjean, M., Schabus, M., Boly, M., Darsaud, A., Desseilles, M., . . . Luxen, A. (2011).  
681 Interplay between spontaneous and induced brain activity during human non-rapid eye movement  
682 sleep. *Proceedings of the National Academy of Sciences*, 108(37), 15438-15443.
- 683 De Gennaro, L., & Ferrara, M. (2003). Sleep spindles: an overview. *Sleep medicine reviews*, 7(5), 423-  
684 440.
- 685 De Gennaro, L., Ferrara, M., & Bertini, M. (2000). The spontaneous K-complex during stage 2 sleep: is it  
686 the ‘forerunner’ of delta waves? *Neuroscience Letters*, 291(1), 41-43.  
687 doi:[https://doi.org/10.1016/S0304-3940\(00\)01366-5](https://doi.org/10.1016/S0304-3940(00)01366-5)
- 688 del Giudice, R., Lechinger, J., Wislowska, M., Heib, D. P., Hoedlmoser, K., & Schabus, M. (2014).  
689 Oscillatory brain responses to own names uttered by unfamiliar and familiar voices. *Brain Res*,  
690 1591, 63-73.
- 691 Dijk, D.-J., & Czeisler, C. A. (1995). Contribution of the circadian pacemaker and the sleep homeostat to  
692 sleep propensity, sleep structure, electroencephalographic slow waves, and sleep spindle activity  
693 in humans. *The Journal of Neuroscience*, 15(5), 3526-3538.
- 694 Dijk, D.-J., Duffy, J. F., & Czeisler, C. A. (1992). Circadian and sleep/wake dependent aspects of  
695 subjective alertness and cognitive performance. *Journal of Sleep Research*, 1(2), 112-117.  
696 doi:10.1111/j.1365-2869.1992.tb00021.x
- 697 Elton, M., Winter, O., Heslenfeld, D., Loewy, D., Campbell, K., & Kok, A. (1997). Event-related  
698 potentials to tones in the absence and presence of sleep spindles. *Journal of Sleep Research*, 6(2),  
699 78-83.
- 700 Grandjean, D., Sander, D., Pourtois, G., Schwartz, S., Seghier, M. L., Scherer, K. R., & Vuilleumier, P.  
701 (2005). The voices of wrath: brain responses to angry prosody in meaningless speech. *Nature*  
702 *neuroscience*, 8, 145. doi:10.1038/n1392  
703 <https://www.nature.com/articles/n1392#supplementary-information>

- 704 Heib, D. P., Hoedlmoser, K., Anderer, P., Zeitlhofer, J., Gruber, G., Klimesch, W., & Schabus, M.  
705 (2013). Slow Oscillation Amplitudes and Up-State Lengths Relate to Memory Improvement.  
706 PLoS One, 8(12), e82049. doi:10.1371/journal.pone.0082049
- 707 Holeckova, I., Fischer, C., Giard, M. H., Delpuech, C., & Morlet, D. (2006). Brain responses to a subject's  
708 own name uttered by a familiar voice. *Brain Res*, 1082(1), 142-152.
- 709 Klimesch, W. (1999). EEG alpha and theta oscillations reflect cognitive and memory performance: a  
710 review and analysis. *Brain Research Reviews*, 29(2-3), 169-195.
- 711 Klimesch, W., Doppelmayr, M., Russegger, H., Pachinger, T., & Schwaiger, J. (1998). Induced alpha  
712 band power changes in the human EEG and attention. *Neuroscience Letters*, 244(2), 73-76.  
713 doi:[http://dx.doi.org/10.1016/S0304-3940\(98\)00122-0](http://dx.doi.org/10.1016/S0304-3940(98)00122-0)
- 714 Klimesch, W., Schack, B., & Sauseng, P. (2005). The functional significance of theta and upper alpha  
715 oscillations. *Experimental Psychology*, 52(2), 99-108.
- 716 Knyazev, G. G. (2007). Motivation, emotion, and their inhibitory control mirrored in brain oscillations.  
717 *Neuroscience & Biobehavioral Reviews*, 31(3), 377-395.  
718 doi:<http://dx.doi.org/10.1016/j.neubiorev.2006.10.004>
- 719 Knyazev, G. G. (2012). EEG delta oscillations as a correlate of basic homeostatic and motivational  
720 processes. *Neuroscience & Biobehavioral Reviews*, 36(1), 677-695.  
721 doi:<http://dx.doi.org/10.1016/j.neubiorev.2011.10.002>
- 722 Laurino, M., Menicucci, D., Piarulli, A., Mastorci, F., Bedini, R., Allegrini, P., & Gemignani, A. (2014).  
723 Disentangling different functional roles of evoked K-complex components: Mapping the sleeping  
724 brain while quenching sensory processing. *Neuroimage*, 86, 433-445.  
725 doi:<http://dx.doi.org/10.1016/j.neuroimage.2013.10.030>
- 726 Llinás, R. R., & Paré, D. (1991). Of dreaming and wakefulness. *Neuroscience*, 44(3), 521-535.  
727 doi:[http://dx.doi.org/10.1016/0306-4522\(91\)90075-Y](http://dx.doi.org/10.1016/0306-4522(91)90075-Y)

- 728 Mair, P., Schoenbrodt, F., & Wilcox, R. R. (2017). WRS2: Wilcox robust estimation and testing (Version  
729 0.9-2).
- 730 Maris, E., & Oostenveld, R. (2007). Nonparametric statistical testing of EEG-and MEG-data. *Journal of*  
731 *Neuroscience Methods*, 164(1), 177-190.
- 732 Massimini, M., & Amzica, F. (2001). Extracellular calcium fluctuations and intracellular potentials in the  
733 cortex during the slow sleep oscillation. *Journal of neurophysiology*, 85(3), 1346-1350.
- 734 Massimini, M., Rosanova, M., & Mariotti, M. (2003). EEG slow (~ 1 Hz) waves are associated with  
735 nonstationarity of thalamo-cortical sensory processing in the sleeping human. *Journal of*  
736 *neurophysiology*, 89(3), 1205-1213.
- 737 Nofzinger, E. A., Mintun, M. A., Wiseman, M., Kupfer, D. J., & Moore, R. Y. (1997). Forebrain  
738 activation in REM sleep: an FDG PET study. *Brain Res*, 770(1), 192-201.
- 739 Oostenveld, R., Fries, P., Maris, E., & Schoffelen, J.-M. (2010). FieldTrip: open source software for  
740 advanced analysis of MEG, EEG, and invasive electrophysiological data. *Computational*  
741 *intelligence and neuroscience*, 2011.
- 742 Oswald, I., Taylor, A. M., & Treisman, M. (1960). Discriminative responses to stimulation during human  
743 sleep. *Brain*.
- 744 Perrin, F., Garcia-Larrea, L., Mauguiere, F., & Bastuji, H. (1999). A differential brain response to the  
745 subject's own name persists during sleep. *Clinical Neurophysiology*, 110(12), 2153-2164.
- 746 Portas, C. M., Krakow, K., Allen, P., Josephs, O., Armony, J. L., & Frith, C. D. (2000). Auditory  
747 processing across the sleep-wake cycle: simultaneous EEG and fMRI monitoring in humans.  
748 *Neuron*, 28(3), 991-999.
- 749 Riedner, B. A., Vyazovskiy, V. V., Huber, R., Massimini, M., Esser, S., Murphy, M., & Tononi, G.  
750 (2007). Sleep homeostasis and cortical synchronization: III. A high-density EEG study of sleep  
751 slow waves in humans. *Sleep*, 30(12), 1643-1657.

- 752 Santhi, N., Lazar, A. S., McCabe, P. J., Lo, J. C., Groeger, J. A., & Dijk, D.-J. (2016). Sex differences in  
753 the circadian regulation of sleep and waking cognition in humans. *Proc Natl Acad Sci U S A*,  
754 113(19), E2730-E2739. doi:10.1073/pnas.1521637113
- 755 Schabus, M., Dang-Vu, T. T., Heib, D. P. J., Boly, M., Desseilles, M., Vandewalle, G., . . . Gais, S.  
756 (2012). The fate of incoming stimuli during NREM sleep is determined by spindles and the phase  
757 of the slow oscillation. *Frontiers in neurology*, 3.
- 758 Sela, Y., Vyazovskiy, V. V., Cirelli, C., Tononi, G., & Nir, Y. (2016). Responses in rat core auditory  
759 cortex are preserved during sleep spindle oscillations. *Sleep*, 39(5), 1069-1082.
- 760 Siclari, F., Baird, B., Perogamvros, L., Bernardi, G., LaRocque, J. J., Riedner, B., . . . Tononi, G. (2017).  
761 The neural correlates of dreaming. *Nature neuroscience*.
- 762 Spreckelmeyer, K. N., Kutas, M., Urbach, T., Altenmüller, E., & Münte, T. F. (2009). Neural processing  
763 of vocal emotion and identity. *Brain Cogn*, 69(1), 121-126.  
764 doi:<https://doi.org/10.1016/j.bandc.2008.06.003>
- 765 Steriade, M. (1991). Normal and Altered States of Function. *Cerebral Cortex*, 9, 279e357.
- 766 Strauss, M., Sitt, J. D., King, J.-R., Elbaz, M., Azizi, L., Buiatti, M., . . . Dehaene, S. (2015). Disruption  
767 of hierarchical predictive coding during sleep. *Proceedings of the National Academy of Sciences*,  
768 112(11), E1353-E1362.
- 769 Uchida, S., Maloney, T., & Feinberg, I. (1992). Beta (20-28 Hz) and delta (0.3-3 Hz) EEGs oscillate  
770 reciprocally across NREM and REM sleep. *Sleep*, 15(4), 352-358.
- 771 Vallat, R., Lajnef, T., Eichenlaub, J.-B., Berthomier, C., Jerbi, K., Morlet, D., & Ruby, P. M. (2017).  
772 Increased Evoked Potentials to Arousing Auditory Stimuli during Sleep: Implication for the  
773 Understanding of Dream Recall. *Front Hum Neurosci*, 11(132). doi:10.3389/fnhum.2017.00132
- 774 van Schalkwijk, F. J., Sauter, C., Hoedlmoser, K., Heib, D. P., Klösch, G., Moser, D., . . . Schabus, M.  
775 (2017). The effect of daytime napping and full-night sleep on the consolidation of declarative and  
776 procedural information. *Journal of Sleep Research*.

- 777 Wehrle, R., Kaufmann, C., Wetter, T. C., Holsboer, F., Auer, D. P., Pollmächer, T., & Czeisler, M. (2007).  
778 Functional microstates within human REM sleep: first evidence from fMRI of a thalamocortical  
779 network specific for phasic REM periods. *European Journal of Neuroscience*, 25(3), 863-871.
- 780 Wilcoxon, R. R. (2011). *Introduction to robust estimation and hypothesis testing*: Academic press.
- 781 Wilcoxon, R. R., & Tian, T. S. (2011). Measuring effect size: a robust heteroscedastic approach for two or  
782 more groups. *Journal of Applied Statistics*, 38(7), 1359-1368.  
783 doi:10.1080/02664763.2010.498507
- 784 World Medical Association (WMA). (1964). Ethical Principles for Medical Research Involving Human  
785 Subjects. 10/13. Retrieved from <http://www.wma.net/en/30publications/10policies/b3/>
- 786 Wyatt, J. K., Cecco, A. R.-D., Czeisler, C. A., & Dijk, D.-J. (1999). Circadian temperature and melatonin  
787 rhythms, sleep, and neurobehavioral function in humans living on a 20-h day. *American Journal*  
788 *of Physiology - Regulatory, Integrative and Comparative Physiology*, 277(4), R1152-R1163.

789

## 790 **Supporting Information**

791 A: Supplementary Material (Methods, Results)
